# Supplementary material
Source: Research Square preprint supplement (doi:10.21203/rs.3.rs-9963688/v1)
Supplement: Supplementary file 1 [file 329e1b232f0361f27c555245.docx]

**Supplementary Table S2**

**Full-text assessment outcomes and article-level audit reconciliation for the final audited corpus**

**Panel A. Documented non-retention at initial full-text assessment (n = 132)**

| **Reason for non-retention at initial full-text assessment** | **n** |
| --- | --- |
| Not focused on veterinary clinical diagnosis in dogs/cats | 60 |
| Not a data-driven AI study within review scope (including non-ML/non-DL/non-NN approaches) | 51 |
| Did not focus on dogs/cats, or dog/cat results were not separately extractable | 7 |
| Review or other non-primary publication | 7 |
| Duplicate or overlapping report identified during full-text handling | 6 |
| Not a peer-reviewed journal article (e.g. preprint) | 1 |
| **Total** | **132** |

**Panel B. Article-level audit actions applied to the provisional charted set before final synthesis**

| **Audit action** | **Rationale after source-paper verification** | **n** |
| --- | --- | --- |
| Removed | Prognostic or future-risk modelling rather than current diagnostic assessment | 3 |
| Removed | Experimental or non-naturally occurring physiology model outside veterinary clinical diagnostic scope | 2 |
| Removed | Technical, anatomical, or methodological task outside diagnostic scope | 4 |
| Removed | Incorrect study row removed after source-paper verification | 1 |
| Reinstated | Eligible diagnostic studies reinstated after article-level re-verification | 4 |
| Added as corrected replacement | Corrected study row added after source-paper verification | 1 |
| **Subtotal removed after audit** |  | **10** |
| **Subtotal added/reinstated after audit** |  | **5** |
| **Net change in provisional charted set** |  | **-5** |

**Panel C. Numerical reconciliation from the initial full-text log to the final audited corpus**

| **Reconciliation item** | **n** |
| --- | --- |
| Documented reports not retained at initial full-text assessment | 132 |
| Additional rows removed during article-level audit of the provisional charted set | +10 |
| Rows reinstated or corrected and added back after article-level re-verification | -5 |
| **Final full-text reports not retained after assessment** | **137** |
| Provisional charted set before audit | 103 |
| **Final audited corpus** | **98** |

*Footnote. Panel A preserves the documented non-retention log from the initial full-text assessment. Panel B reports subsequent article-level audit actions applied to the provisional charted set during final source-paper verification before synthesis. This audit was a final verification and reconciliation step applied to the provisional charted set, not a separate de novo full-text screening round. Panel C provides the numerical reconciliation linking the initial full-text log, the provisional 103-study charted set, and the final audited corpus of 98 studies. Counts reported in Panel B are study-row actions within the provisional charted set. All manuscript counts and grouped descriptive summaries were recalculated from the article-level verified final dataset.*
