# Supplementary material
Source: Research Square preprint supplement (doi:10.21203/rs.3.rs-9963688/v1)
Supplement: Supplementary file 2 [file 376e152eda2082f574162e76.docx]

**Supplementary table S1**

**Full database-specific search strategies (1984–2024)**

**Table S1.** Full database-specific search strategies used for the scoping review. Searches were executed in January 2025. Where available, limits were applied for English language, publication years 1984–2024, and journal articles, with conference proceedings excluded when platform filters allowed.

**Presentation note.** For readability, database-specific strategies are presented by database section rather than as a single large table. Search strings are presented in standardised readable form; standardisation was limited to spacing, quotation marks, and bracket punctuation.

# Summary of information sources

| **Database / platform** | **Coverage** | **Date searched** | **No. of documented search strings** | **Limits / filters applied** |
| --- | --- | --- | --- | --- |
| PubMed | 1984–2024 | January 2025 | 6 | English; 1984–2024 |
| Scopus | 1984–2024 | January 2025 | 36 | English; journal articles; 1984–2024 |
| Web of Science Core Collection | 1984–2024 | January 2025 | 36 | English; 1984–2024 |
| IEEE Xplore | 1984–2024 | January 2025 | 36 | English (manual); journals; 1984–2024 |
| ACM Digital Library | 1984–2024 | January 2025 | 36 | English (manual); 1984–2024 |
| CAB Abstracts | 1984–2024 | January 2025 | 36 | English; 1984–2024 |
| Wiley Online Library | 1984–2024 | January 2025 | 36 | English (manual); 1984–2024 |
| Manual search (snowballing) | N/A | January 2025 | 1 | N/A |

# PubMed

| **Coverage** | 1984–2024 |
| --- | --- |
| **Date searched** | January 2025 |
| **Limits / filters applied** | English; 1984–2024 |

## Search strings

| **No.** | **Search string** |
| --- | --- |
| 1 | (("Artificial Intelligence"[Mesh]) AND "Diagnosis"[Mesh] AND "Dogs"[Mesh]) |
| 2 | (("Artificial Intelligence"[Mesh]) AND "Diagnosis"[Mesh] AND "Cats"[Mesh]) |
| 3 | (("Predictive Learning Models"[Mesh]) AND "Diagnosis"[Mesh] AND "Dogs"[Mesh]) |
| 4 | (("Predictive Learning Models"[Mesh]) AND "Diagnosis"[Mesh] AND "Cats"[Mesh]) |
| 5 | (("Image Processing, Computer-Assisted"[Mesh]) AND "Diagnosis"[Mesh] AND "Dogs"[Mesh]) |
| 6 | (("Image Processing, Computer-Assisted"[Mesh]) AND "Diagnosis"[Mesh] AND "Cats"[Mesh]) |

# Scopus

| **Coverage** | 1984–2024 |
| --- | --- |
| **Date searched** | January 2025 |
| **Limits / filters applied** | English; journal articles; 1984–2024 |

## Search strings

| **No.** | **Search string** |
| --- | --- |
| 1 | ( ALL ( Artificial intelligence ) AND ALL ( Dog ) AND ALL ( Diagnosis ) ) |
| 2 | ( ALL ( Artificial intelligence ) AND ALL ( Cat ) AND ALL ( Diagnosis ) ) |
| 3 | ( ALL ( Artificial intelligence ) AND ALL ( Canine ) AND ALL ( Diagnosis ) ) |
| 4 | ( ALL ( Artificial intelligence ) AND ALL ( Feline ) AND ALL ( Diagnosis ) ) |
| 5 | ( ALL ( Intelligent systems ) AND ALL ( Dog ) AND ALL ( Diagnosis ) ) |
| 6 | ( ALL ( Intelligent systems ) AND ALL ( Cat ) AND ALL ( Diagnosis ) ) |
| 7 | ( ALL ( Intelligent systems ) AND ALL ( Canine ) AND ALL ( Diagnosis ) ) |
| 8 | ( ALL ( Intelligent systems ) AND ALL ( Feline ) AND ALL ( Diagnosis ) ) |
| 9 | ( ALL ( Pattern analysis ) AND ALL ( Dog ) AND ALL ( Diagnosis ) ) |
| 10 | ( ALL ( Pattern analysis ) AND ALL ( Cat ) AND ALL ( Diagnosis ) ) |
| 11 | ( ALL ( Pattern analysis ) AND ALL ( Canine ) AND ALL ( Diagnosis ) ) |
| 12 | ( ALL ( Pattern analysis ) AND ALL ( Feline ) AND ALL ( Diagnosis ) ) |
| 13 | ( ALL ( Predictive models ) AND ALL ( Dog ) AND ALL ( Diagnosis ) ) |
| 14 | ( ALL ( Predictive models ) AND ALL ( Cat ) AND ALL ( Diagnosis ) ) |
| 15 | ( ALL ( Predictive models ) AND ALL ( Canine ) AND ALL ( Diagnosis ) ) |
| 16 | ( ALL ( Predictive models ) AND ALL ( Feline ) AND ALL ( Diagnosis ) ) |
| 17 | ( ALL ( Image processing ) AND ALL ( Dog ) AND ALL ( Diagnosis ) ) |
| 18 | ( ALL ( Image processing ) AND ALL ( Cat ) AND ALL ( Diagnosis ) ) |
| 19 | ( ALL ( Image processing ) AND ALL ( Canine ) AND ALL ( Diagnosis ) ) |
| 20 | ( ALL ( Image processing ) AND ALL ( Feline ) AND ALL ( Diagnosis ) ) |
| 21 | ( ALL ( Computer vision ) AND ALL ( Dog ) AND ALL ( Diagnosis ) ) |
| 22 | ( ALL ( Computer vision ) AND ALL ( Cat ) AND ALL ( Diagnosis ) ) |
| 23 | ( ALL ( Computer vision ) AND ALL ( Canine ) AND ALL ( Diagnosis ) ) |
| 24 | ( ALL ( Computer vision ) AND ALL ( Feline ) AND ALL ( Diagnosis ) ) |
| 25 | ( ALL ( Machine learning ) AND ALL ( Dog ) AND ALL ( Diagnosis ) ) |
| 26 | ( ALL ( Machine learning ) AND ALL ( Cat ) AND ALL ( Diagnosis ) ) |
| 27 | ( ALL ( Machine learning ) AND ALL ( Canine ) AND ALL ( Diagnosis ) ) |
| 28 | ( ALL ( Machine learning ) AND ALL ( Feline ) AND ALL ( Diagnosis ) ) |
| 29 | ( ALL ( Neural network ) AND ALL ( Dog ) AND ALL ( Diagnosis ) ) |
| 30 | ( ALL ( Neural network ) AND ALL ( Cat ) AND ALL ( Diagnosis ) ) |
| 31 | ( ALL ( Neural network ) AND ALL ( Canine ) AND ALL ( Diagnosis ) ) |
| 32 | ( ALL ( Neural network ) AND ALL ( Feline ) AND ALL ( Diagnosis ) ) |
| 33 | ( ALL ( Deep learning ) AND ALL ( Dog ) AND ALL ( Diagnosis ) ) |
| 34 | ( ALL ( Deep learning ) AND ALL ( Cat ) AND ALL ( Diagnosis ) ) |
| 35 | ( ALL ( Deep learning ) AND ALL ( Canine ) AND ALL ( Diagnosis ) ) |
| 36 | ( ALL ( Deep learning ) AND ALL ( Feline ) AND ALL ( Diagnosis ) ) |

# Web of Science Core Collection

| **Coverage** | 1984–2024 |
| --- | --- |
| **Date searched** | January 2025 |
| **Limits / filters applied** | English; 1984–2024 |

## Search strings

| **No.** | **Search string** |
| --- | --- |
| 1 | ((ALL=("Artificial intelligence")) AND ALL=(Dog)) AND ALL=(Diagnosis) |
| 2 | ((ALL=("Artificial intelligence")) AND ALL=(Cat)) AND ALL=(Diagnosis) |
| 3 | ((ALL=("Artificial intelligence")) AND ALL=(Canine)) AND ALL=(Diagnosis) |
| 4 | ((ALL=("Artificial intelligence")) AND ALL=(Feline)) AND ALL=(Diagnosis) |
| 5 | ((ALL=("Intelligent systems")) AND ALL=(Dog)) AND ALL=(Diagnosis) |
| 6 | ((ALL=("Intelligent systems")) AND ALL=(Cat)) AND ALL=(Diagnosis) |
| 7 | ((ALL=("Intelligent systems")) AND ALL=(Canine)) AND ALL=(Diagnosis) |
| 8 | ((ALL=("Intelligent systems")) AND ALL=(Feline)) AND ALL=(Diagnosis) |
| 9 | ((ALL=("Pattern analysis")) AND ALL=(Dog)) AND ALL=(Diagnosis) |
| 10 | ((ALL=("Pattern analysis")) AND ALL=(Cat)) AND ALL=(Diagnosis) |
| 11 | ((ALL=("Pattern analysis")) AND ALL=(Canine)) AND ALL=(Diagnosis) |
| 12 | ((ALL=("Pattern analysis")) AND ALL=(Feline)) AND ALL=(Diagnosis) |
| 13 | ((ALL=("Predictive models")) AND ALL=(Dog)) AND ALL=(Diagnosis) |
| 14 | ((ALL=("Predictive models")) AND ALL=(Cat)) AND ALL=(Diagnosis) |
| 15 | ((ALL=("Predictive models")) AND ALL=(Canine)) AND ALL=(Diagnosis) |
| 16 | ((ALL=("Predictive models")) AND ALL=(Feline)) AND ALL=(Diagnosis) |
| 17 | ((ALL=("Image processing")) AND ALL=(Dog)) AND ALL=(Diagnosis) |
| 18 | ((ALL=("Image processing")) AND ALL=(Cat)) AND ALL=(Diagnosis) |
| 19 | ((ALL=("Image processing")) AND ALL=(Canine)) AND ALL=(Diagnosis) |
| 20 | ((ALL=("Image processing")) AND ALL=(Feline)) AND ALL=(Diagnosis) |
| 21 | ((ALL=("Computer vision")) AND ALL=(Dog)) AND ALL=(Diagnosis) |
| 22 | ((ALL=("Computer vision")) AND ALL=(Cat)) AND ALL=(Diagnosis) |
| 23 | ((ALL=("Computer vision")) AND ALL=(Canine)) AND ALL=(Diagnosis) |
| 24 | ((ALL=("Computer vision")) AND ALL=(Feline)) AND ALL=(Diagnosis) |
| 25 | ((ALL=("Machine learning")) AND ALL=(Dog)) AND ALL=(Diagnosis) |
| 26 | ((ALL=("Machine learning")) AND ALL=(Cat)) AND ALL=(Diagnosis) |
| 27 | ((ALL=("Machine learning")) AND ALL=(Canine)) AND ALL=(Diagnosis) |
| 28 | ((ALL=("Machine learning")) AND ALL=(Feline)) AND ALL=(Diagnosis) |
| 29 | ((ALL=("Neural network")) AND ALL=(Dog)) AND ALL=(Diagnosis) |
| 30 | ((ALL=("Neural network")) AND ALL=(Cat)) AND ALL=(Diagnosis) |
| 31 | ((ALL=("Neural Network")) AND ALL=(Canine)) AND ALL=(Diagnosis) |
| 32 | ((ALL=("Neural network")) AND ALL=(Feline)) AND ALL=(Diagnosis) |
| 33 | ((ALL=("Deep learning")) AND ALL=(Dog)) AND ALL=(Diagnosis) |
| 34 | ((ALL=("Deep learning")) AND ALL=(Cat)) AND ALL=(Diagnosis) |
| 35 | ((ALL=("Deep learning")) AND ALL=(Canine)) AND ALL=(Diagnosis) |
| 36 | ((ALL=("Deep learning")) AND ALL=(Feline)) AND ALL=(Diagnosis) |

# IEEE Xplore

| **Coverage** | 1984–2024 |
| --- | --- |
| **Date searched** | January 2025 |
| **Limits / filters applied** | English (manual); journals; 1984–2024 |

## Search strings

| **No.** | **Search string** |
| --- | --- |
| 1 | ("All Metadata":"Artificial intelligence") AND ("All Metadata":"Dog") AND ("All Metadata":"Diagnosis") |
| 2 | ("All Metadata":"Artificial intelligence") AND ("All Metadata":"Cat") AND ("All Metadata":"Diagnosis") |
| 3 | ("All Metadata":"Artificial intelligence") AND ("All Metadata":"Canine") AND ("All Metadata":"Diagnosis") |
| 4 | ("All Metadata":"Artificial intelligence") AND ("All Metadata":"Feline") AND ("All Metadata":"Diagnosis") |
| 5 | ("All Metadata":"Intelligent systems") AND ("All Metadata":"Dog") AND ("All Metadata":"Diagnosis") |
| 6 | ("All Metadata":"Intelligent systems") AND ("All Metadata":"Cat") AND ("All Metadata":"Diagnosis") |
| 7 | ("All Metadata":"Intelligent systems") AND ("All Metadata":"Canine") AND ("All Metadata":"Diagnosis") |
| 8 | ("All Metadata":"Intelligent systems") AND ("All Metadata":"Feline") AND ("All Metadata":"Diagnosis") |
| 9 | ("All Metadata":"Pattern analysis") AND ("All Metadata":"Dog") AND ("All Metadata":"Diagnosis") |
| 10 | ("All Metadata":"Pattern analysis") AND ("All Metadata":"Cat") AND ("All Metadata":"Diagnosis") |
| 11 | ("All Metadata":"Pattern analysis") AND ("All Metadata":"Canine") AND ("All Metadata":"Diagnosis") |
| 12 | ("All Metadata":"Pattern analysis") AND ("All Metadata":"Feline") AND ("All Metadata":"Diagnosis") |
| 13 | ("All Metadata":"Predictive models") AND ("All Metadata":"Dog") AND ("All Metadata":"Diagnosis") |
| 14 | ("All Metadata":"Predictive models") AND ("All Metadata":"Cat") AND ("All Metadata":"Diagnosis") |
| 15 | ("All Metadata":"Predictive models") AND ("All Metadata":"Canine") AND ("All Metadata":"Diagnosis") |
| 16 | ("All Metadata":"Predictive models") AND ("All Metadata":"Feline") AND ("All Metadata":"Diagnosis") |
| 17 | ("All Metadata":"Image processing") AND ("All Metadata":"Dog") AND ("All Metadata":"Diagnosis") |
| 18 | ("All Metadata":"Image processing") AND ("All Metadata":"Cat") AND ("All Metadata":"Diagnosis") |
| 19 | ("All Metadata":"Image processing") AND ("All Metadata":"Canine") AND ("All Metadata":"Diagnosis") |
| 20 | ("All Metadata":"Image processing") AND ("All Metadata":"Feline") AND ("All Metadata":"Diagnosis") |
| 21 | ("All Metadata":"Computer vision") AND ("All Metadata":"Dog") AND ("All Metadata":"Diagnosis") |
| 22 | ("All Metadata":"Computer vision") AND ("All Metadata":"Cat") AND ("All Metadata":"Diagnosis") |
| 23 | ("All Metadata":"Computer vision") AND ("All Metadata":"Canine") AND ("All Metadata":"Diagnosis") |
| 24 | ("All Metadata":"Computer vision") AND ("All Metadata":"Feline") AND ("All Metadata":"Diagnosis") |
| 25 | ("All Metadata":"Machine learning") AND ("All Metadata":"Dog") AND ("All Metadata":"Diagnosis") |
| 26 | ("All Metadata":"Machine learning") AND ("All Metadata":"Cat") AND ("All Metadata":"Diagnosis") |
| 27 | ("All Metadata":"Machine learning") AND ("All Metadata":"Canine") AND ("All Metadata":"Diagnosis") |
| 28 | ("All Metadata":"Machine learning") AND ("All Metadata":"Feline") AND ("All Metadata":"Diagnosis") |
| 29 | ("All Metadata":"Neural network") AND ("All Metadata":"Dog") AND ("All Metadata":"Diagnosis") |
| 30 | ("All Metadata":"Neural network") AND ("All Metadata":"Cat") AND ("All Metadata":"Diagnosis") |
| 31 | ("All Metadata":"Neural network") AND ("All Metadata":"Canine") AND ("All Metadata":"Diagnosis") |
| 32 | ("All Metadata":"Neural network") AND ("All Metadata":"Feline") AND ("All Metadata":"Diagnosis") |
| 33 | ("All Metadata":"Deep learning") AND ("All Metadata":"Dog") AND ("All Metadata":"Diagnosis") |
| 34 | ("All Metadata":"Deep learning") AND ("All Metadata":"Cat") AND ("All Metadata":"Diagnosis") |
| 35 | ("All Metadata":"Deep learning") AND ("All Metadata":"Canine") AND ("All Metadata":"Diagnosis") |
| 36 | ("All Metadata":"Deep learning") AND ("All Metadata":"Feline") AND ("All Metadata":"Diagnosis") |

# ACM Digital Library

| **Coverage** | 1984–2024 |
| --- | --- |
| **Date searched** | January 2025 |
| **Limits / filters applied** | English (manual); 1984–2024 |

## Search strings

| **No.** | **Search string** |
| --- | --- |
| 1 | [All: "Artificial intelligence"] AND [All: "Dog"] AND [All: "Diagnosis"] |
| 2 | [All: "Artificial intelligence"] AND [All: "Cat"] AND [All: "Diagnosis"] |
| 3 | [All: "Artificial intelligence"] AND [All: "Canine"] AND [All: "Diagnosis"] |
| 4 | [All: "Artificial intelligence"] AND [All: "Feline"] AND [All: "Diagnosis"] |
| 5 | [All: "Intelligent systems"] AND [All: "Dog"] AND [All: "Diagnosis"] |
| 6 | [All: "Intelligent systems"] AND [All: "Cat"] AND [All: "Diagnosis"] |
| 7 | [All: "Intelligent systems"] AND [All: "Canine"] AND [All: "Diagnosis"] |
| 8 | [All: "Intelligent systems"] AND [All: "Feline"] AND [All: "Diagnosis"] |
| 9 | [All: "Pattern analysis"] AND [All: "Dog"] AND [All: "Diagnosis"] |
| 10 | [All: "Pattern analysis"] AND [All: "Cat"] AND [All: "Diagnosis"] |
| 11 | [All: "Pattern analysis"] AND [All: "Canine"] AND [All: "Diagnosis"] |
| 12 | [All: "Pattern analysis"] AND [All: "Feline"] AND [All: "Diagnosis"] |
| 13 | [All: "Predictive models"] AND [All: "Dog"] AND [All: "Diagnosis"] |
| 14 | [All: "Predictive models"] AND [All: "Cat"] AND [All: "Diagnosis"] |
| 15 | [All: "Predictive models"] AND [All: "Canine"] AND [All: "Diagnosis"] |
| 16 | [All: "Predictive models"] AND [All: "Feline"] AND [All: "Diagnosis"] |
| 17 | [All: "Image processing"] AND [All: "Dog"] AND [All: "Diagnosis"] |
| 18 | [All: "Image processing"] AND [All: "Cat"] AND [All: "Diagnosis"] |
| 19 | [All: "Image processing"] AND [All: "Canine"] AND [All: "Diagnosis"] |
| 20 | [All: "Image processing"] AND [All: "Feline"] AND [All: "Diagnosis"] |
| 21 | [All: "Computer vision"] AND [All: "Dog"] AND [All: "Diagnosis"] |
| 22 | [All: "Computer vision"] AND [All: "Cat"] AND [All: "Diagnosis"] |
| 23 | [All: "Computer vision"] AND [All: "Canine"] AND [All: "Diagnosis"] |
| 24 | [All: "Computer vision"] AND [All: "Feline"] AND [All: "Diagnosis"] |
| 25 | [All: "Machine learning"] AND [All: "Dog"] AND [All: "Diagnosis"] |
| 26 | [All: "Machine learning"] AND [All: "Cat"] AND [All: "Diagnosis"] |
| 27 | [All: "Machine learning"] AND [All: "Canine"] AND [All: "Diagnosis"] |
| 28 | [All: "Machine learning"] AND [All: "Feline"] AND [All: "Diagnosis"] |
| 29 | [All: "Neural network"] AND [All: "Dog"] AND [All: "Diagnosis"] |
| 30 | [All: "Neural network"] AND [All: "Cat"] AND [All: "Diagnosis"] |
| 31 | [All: "Neural network"] AND [All: "Canine"] AND [All: "Diagnosis"] |
| 32 | [All: "Neural network"] AND [All: "Feline"] AND [All: "Diagnosis"] |
| 33 | [All: "Deep learning"] AND [All: "Dog"] AND [All: "Diagnosis"] |
| 34 | [All: "Deep learning"] AND [All: "Cat"] AND [All: "Diagnosis"] |
| 35 | [All: "Deep learning"] AND [All: "Canine"] AND [All: "Diagnosis"] |
| 36 | [All: "Deep learning"] AND [All: "Feline"] AND [All: "Diagnosis"] |

# CAB Abstracts

| **Coverage** | 1984–2024 |
| --- | --- |
| **Date searched** | January 2025 |
| **Limits / filters applied** | English; 1984–2024 |

## Search strings

| **No.** | **Search string** |
| --- | --- |
| 1 | AllField:(Artificial intelligence) AND AllField:(Dog) AND AllField:(Diagnosis) |
| 2 | AllField:(Artificial intelligence) AND AllField:(Cat) AND AllField:(Diagnosis) |
| 3 | AllField:(Artificial intelligence) AND AllField:(Canine) AND AllField:(Diagnosis) |
| 4 | AllField:(Artificial intelligence) AND AllField:(Feline) AND AllField:(Diagnosis) |
| 5 | AllField:(Intelligent systems) AND AllField:(Dog) AND AllField:(Diagnosis) |
| 6 | AllField:(Intelligent systems) AND AllField:(Cat) AND AllField:(Diagnosis) |
| 7 | AllField:(Intelligent systems) AND AllField:(Canine) AND AllField:(Diagnosis) |
| 8 | AllField:(Intelligent system) AND AllField:(Feline) AND AllField:(Diagnosis) |
| 9 | AllField:(Pattern analysis) AND AllField:(Dog) AND AllField:(Diagnosis) |
| 10 | AllField:(Pattern analysis) AND AllField:(Cat) AND AllField:(Diagnosis) |
| 11 | AllField:(Pattern analysis) AND AllField:(Canine) AND AllField:(Diagnosis) |
| 12 | AllField:(Pattern analysis) AND AllField:(Feline) AND AllField:(Diagnosis) |
| 13 | AllField:(Predictive models) AND AllField:(Dog) AND AllField:(Diagnosis) |
| 14 | AllField:(Predictive models) AND AllField:(Cat) AND AllField:(Diagnosis) |
| 15 | AllField:(Predictive models) AND AllField:(Canine) AND AllField:(Diagnosis) |
| 16 | AllField:(Predictive models) AND AllField:(Feline) AND AllField:(Diagnosis) |
| 17 | AllField:(Image processing) AND AllField:(Dog) AND AllField:(Diagnosis) |
| 18 | AllField:(Image processing) AND AllField:(Cat) AND AllField:(Diagnosis) |
| 19 | AllField:(Image processing) AND AllField:(Canine) AND AllField:(Diagnosis) |
| 20 | AllField:(Image processing) AND AllField:(Feline) AND AllField:(Diagnosis) |
| 21 | AllField:(Computer vision) AND AllField:(Dog) AND AllField:(Diagnosis) |
| 22 | AllField:(Computer vision) AND AllField:(Cat) AND AllField:(Diagnosis) |
| 23 | AllField:(Computer vision) AND AllField:(Canine) AND AllField:(Diagnosis) |
| 24 | AllField:(Computer vision) AND AllField:(Feline) AND AllField:(Diagnosis) |
| 25 | AllField:(Machine learning) AND AllField:(Dog) AND AllField:(Diagnosis) |
| 26 | AllField:(Machine learning) AND AllField:(Cat) AND AllField:(Diagnosis) |
| 27 | AllField:(Machine learning) AND AllField:(Canine) AND AllField:(Diagnosis) |
| 28 | AllField:(Machine learning) AND AllField:(Feline) AND AllField:(Diagnosis) |
| 29 | AllField:(Neural network) AND AllField:(Dog) AND AllField:(Diagnosis) |
| 30 | AllField:(Neural network) AND AllField:(Cat) AND AllField:(Diagnosis) |
| 31 | AllField:(Neural network) AND AllField:(Canine) AND AllField:(Diagnosis) |
| 32 | AllField:(Neural network) AND AllField:(Feline) AND AllField:(Diagnosis) |
| 33 | AllField:(Deep learning) AND AllField:(Dog) AND AllField:(Diagnosis) |
| 34 | AllField:(Deep learning) AND AllField:(Cat) AND AllField:(Diagnosis) |
| 35 | AllField:(Deep learning) AND AllField:(Canine) AND AllField:(Diagnosis) |
| 36 | AllField:(Deep learning) AND AllField:(Feline) AND AllField:(Diagnosis) |

# Wiley Online Library

| **Coverage** | 1984–2024 |
| --- | --- |
| **Date searched** | January 2025 |
| **Limits / filters applied** | English (manual); 1984–2024 |

## Search strings

| **No.** | **Search string** |
| --- | --- |
| 1 | "Artificial intelligence" anywhere AND "Dog" anywhere AND "Diagnosis" anywhere |
| 2 | "Artificial intelligence" anywhere AND "Cat" anywhere AND "Diagnosis" anywhere |
| 3 | "Artificial intelligence" anywhere AND "Canine" anywhere AND "Diagnosis" anywhere |
| 4 | "Artificial intelligence" anywhere AND "Feline" anywhere AND "Diagnosis" anywhere |
| 5 | "Intelligent systems" anywhere AND "Dog" anywhere AND "Diagnosis" anywhere |
| 6 | "Intelligent systems" anywhere AND "Cat" anywhere AND "Diagnosis" anywhere |
| 7 | "Intelligent systems" anywhere AND "Canine" anywhere AND "Diagnosis" anywhere |
| 8 | "Intelligent systems" anywhere AND "Feline" anywhere AND "Diagnosis" anywhere |
| 9 | "Pattern analysis" anywhere AND "Dog" anywhere AND "Diagnosis" anywhere |
| 10 | "Pattern analysis" anywhere AND "Cat" anywhere AND "Diagnosis" anywhere |
| 11 | "Pattern analysis" anywhere AND "Canine" anywhere AND "Diagnosis" anywhere |
| 12 | "Pattern analysis" anywhere AND "Feline" anywhere AND "Diagnosis" anywhere |
| 13 | "Predictive models" anywhere AND "Dog" anywhere AND "Diagnosis" anywhere |
| 14 | "Predictive models" anywhere AND "Cat" anywhere AND "Diagnosis" anywhere |
| 15 | "Predictive models" anywhere AND "Canine" anywhere AND "Diagnosis" anywhere |
| 16 | "Predictive models" anywhere AND "Feline" anywhere AND "Diagnosis" anywhere |
| 17 | "Image processing" anywhere AND "Dog" anywhere AND "Diagnosis" anywhere |
| 18 | "Image processing" anywhere AND "Cat" anywhere AND "Diagnosis" anywhere |
| 19 | "Image processing" anywhere AND "Canine" anywhere AND "Diagnosis" anywhere |
| 20 | "Image processing" anywhere AND "Feline" anywhere AND "Diagnosis" anywhere |
| 21 | "Computer vision" anywhere AND "Dog" anywhere AND "Diagnosis" anywhere |
| 22 | "Computer vision" anywhere AND "Cat" anywhere AND "Diagnosis" anywhere |
| 23 | "Computer vision" anywhere AND "Canine" anywhere AND "Diagnosis" anywhere |
| 24 | "Computer vision" anywhere AND "Feline" anywhere AND "Diagnosis" anywhere |
| 25 | "Machine learning" anywhere AND "Dog" anywhere AND "Diagnosis" anywhere |
| 26 | "Machine learning" anywhere AND "Cat" anywhere AND "Diagnosis" anywhere |
| 27 | "Machine learning" anywhere AND "Canine" anywhere AND "Diagnosis" anywhere |
| 28 | "Machine learning" anywhere AND "Feline" anywhere AND "Diagnosis" anywhere |
| 29 | "Neural network" anywhere AND "Dog" anywhere AND "Diagnosis" anywhere |
| 30 | "Neural network" anywhere AND "Cat" anywhere AND "Diagnosis" anywhere |
| 31 | "Neural network" anywhere AND "Canine" anywhere AND "Diagnosis" anywhere |
| 32 | "Neural network" anywhere AND "Feline" anywhere AND "Diagnosis" anywhere |
| 33 | "Deep learning" anywhere AND "Dog" anywhere AND "Diagnosis" anywhere |
| 34 | "Deep learning" anywhere AND "Cat" anywhere AND "Diagnosis" anywhere |
| 35 | "Deep learning" anywhere AND "Canine" anywhere AND "Diagnosis" anywhere |
| 36 | "Deep learning" anywhere AND "Feline" anywhere AND "Diagnosis" anywhere |

# Manual search (snowballing)

| **Coverage** | N/A |
| --- | --- |
| **Date searched** | January 2025 |

Reference list screening of all included studies and relevant reviews; records were screened against the same eligibility criteria.

**Note.** Searches were executed in January 2025. Search strategies combined terms for artificial intelligence / machine learning / deep learning and related concepts, dog/canine and cat/feline terms, and diagnosis / diagnostic context, adapted to database-specific syntax and field designations. Separate species-specific queries were run where applicable. For readability, spacing, quotation marks, and bracket punctuation were standardized in this supplement where needed for typographic consistency; no search concept blocks, species terms, field labels, or query combinations were changed. Database-specific retrieval yields were not retained after de-duplication; identification results are therefore reported as aggregate totals in Figure 1.
