# Supplementary material
Source: Research Square preprint supplement (doi:10.21203/rs.3.rs-9963688/v1)
Supplement: Supplementary file 3 [file da63d32e810554d676f8c314.pdf]

Online resource S3. Study-level charting dataset for the final audited corpus (n = 98)

Study-level variables are presented in grouped form aligned with the descriptive synthesis reported in the manuscript; DOI/URL is retained for traceability.

| Study citation            | Year | DOI / URL                                                                                                       | Species     | Clinical problem / diagnostic domain                                                                                                                            | Primary data modality (as charted)                                                      | Primary AI task (grouped)              | AI methodological family             | Reference standard (ground truth)                                                                               | Sample size (n)                                                                           | Validation strategy (as reported)                                                    | External validation | Primary diagnostic metric (as reported)                                               | Open data | Open data link / identifier                                                                                                   | Open code                                                                             | Open code link / identifier                                                                                                   | Interpretability | Multicentre            | Evaluation unit (grouped) |
|---------------------------|------|-----------------------------------------------------------------------------------------------------------------|-------------|-----------------------------------------------------------------------------------------------------------------------------------------------------------------|-----------------------------------------------------------------------------------------|----------------------------------------|--------------------------------------|-----------------------------------------------------------------------------------------------------------------|-------------------------------------------------------------------------------------------|--------------------------------------------------------------------------------------|---------------------|---------------------------------------------------------------------------------------|-----------|-------------------------------------------------------------------------------------------------------------------------------|---------------------------------------------------------------------------------------|-------------------------------------------------------------------------------------------------------------------------------|------------------|------------------------|---------------------------|
| Kajima et al., 2012       | 2012 | <a href="https://doi.org/10.2460/ajvr.73.7.973">https://doi.org/10.2460/ajvr.73.7.973</a>                       | Dog-only    | Automated lameness severity assessment from gait analysis                                                                                                       | Force plate / gait analysis (ground reaction force waveforms)                           | Classification / diagnostic prediction | Neural networks (non-deep / non-CNN) | Subjective diagnostic lameness score during trotting (scores 1-3) assigned by                                   | Animal/cases: 21 dogs;                                                                    | Dog-wise split: data from 14 dogs for model development                              | No                  | Overall accuracy (96-99% with 2 preferred input)                                      | No        | No                                                                                                                            | No                                                                                    | No                                                                                                                            | No               | Signal/waveform record |                           |
| Mirkes et al., 2014       | 2014 | <a href="https://doi.org/10.1016/j.comptom.2014.08.006">https://doi.org/10.1016/j.comptom.2014.08.006</a>       | Dog-only    | Canine lymphoma diagnosis; screening; remission monitoring/link evaluation                                                                                      | Tabular – serum biomarkers and clinical variables (CP, haematology, age, sex)           | Mixed-output tasks                     | Machine learning-based approaches    | Lymphoma confirmed by excisional biopsy or fine needle aspirate; non-lymphoma cases confirmed by histopathology | Animal/cases: 303 dogs;                                                                   | Leave-one-out cross-validation (LOOCV) used for model validation                     | No                  | Differential diagnosis sensitivity/specificity (98.7%/98.7%)                          | No        | No                                                                                                                            | No                                                                                    | No                                                                                                                            | Yes              | Yes                    | Case                      |
| Takagi et al., 2014       | 2014 | <a href="https://doi.org/10.1587/transinf.2013E07464">https://doi.org/10.1587/transinf.2013E07464</a>           | Dog-only    | Benign vs malignant focal splenic lesion classification                                                                                                         | Contrast-enhanced ultrasound (CEUS) / time-intensity curves                             | Classification / diagnostic prediction | Machine learning-based approaches    | Histology or cytology                                                                                           | Animal/cases: 36 canine focal splenic lesions;                                            | Hyperparameter optimization                                                          | No                  | Accuracy (91.7%, 33/36)                                                               | NR        | No                                                                                                                            | No                                                                                    | No                                                                                                                            | No               | Lesion/sequence        |                           |
| Awayseh et al., 2016      | 2016 | <a href="https://doi.org/10.1177/1040658716657377">https://doi.org/10.1177/1040658716657377</a>                 | Cat-only    | Differential diagnosis of inflammatory bowel disease vs alimentary lymphoma (and normal vs disease)                                                             | Tabular / laboratory data (CBC, serum chemistry)                                        | Classification / diagnostic prediction | Machine learning-based approaches    | Endoscopic duodenal biopsy histopathology, original attending                                                   | Animal/cases: 120 cats;                                                                   | CV/resampling: 10-fold cross-validation repeated 10 random                           | No                  | Sensitivity                                                                           | NR        | NR                                                                                                                            | NR                                                                                    | Yes                                                                                                                           | No               | Animal/patient/case    |                           |
| Torreclia et al., 2017    | 2017 | <a href="https://doi.org/10.1016/j.vetpar.2016.12.016">https://doi.org/10.1016/j.vetpar.2016.12.016</a>         | Dog-only    | Canine leishmaniasis; lymph node parasite load estimation                                                                                                       | Tabular / laboratory / clinical data (serology; biochemical markers; physical exam)     | Regression                             | Neural networks (non-deep / non-CNN) | qPCR quantification of Leishmania infantum load in lymph node aspirates                                         | Animal/cases: 55 dogs (35 infected);                                                      | CV/resampling: leave-one-out cross-validation; bootstrap                             | No                  | Correlation between observed and predicted                                            | NR        | NR                                                                                                                            | NR                                                                                    | No                                                                                                                            | Yes              | Animal/patient/case    |                           |
| Banzato et al., 2018a     | 2018 | <a href="https://doi.org/10.1016/j.tvjl.2018.04.001">https://doi.org/10.1016/j.tvjl.2018.04.001</a>             | Dog-only    | Prediction of histopathological grading of canine meningiomas from MRI images                                                                                   | Imaging – MRI (pre-contrast T1W; post-contrast T1W; T2W)                                | Classification / diagnostic prediction | Deep learning-based approaches       | Histopathological grading of canine meningiomas (WHO 2007 grades I-III)                                         | Animal/cases: 56 selected meningiomas;                                                    | Split: 60% training / 10% validation / 30% test;                                     | No                  | Accuracy (82.2% with soCNN on post-contrast T1 images)                                | NR        | NR                                                                                                                            | NR                                                                                    | No                                                                                                                            | Yes              | Image                  |                           |
| Banzato et al., 2018b     | 2018 | <a href="https://doi.org/10.1186/s12917-018-1638-2">https://doi.org/10.1186/s12917-018-1638-2</a>               | Dog-only    | Differentiation of canine meningiomas vs gliomas on MRI images                                                                                                  | Imaging – MRI (pre-contrast T1W; post-contrast T1W; T2W)                                | Classification / diagnostic prediction | Deep learning-based approaches       | Final histopathological diagnosis of meningiomas or gliomas                                                     | Animal/cases: 80 selected meningiomas or gliomas;                                         | Split: 70% training / 15% validation / 15% test;                                     | No                  | Accuracy (94% on post-contrast T1 images)                                             | No        | Available on reasonable request from authors with permission from Research Ethics Committee                                   | NR                                                                                    | NR                                                                                                                            | No               | Yes                    | Image                     |
| Banzato et al., 2018c     | 2018 | <a href="https://doi.org/10.1016/j.tvjl.2017.12.026">https://doi.org/10.1016/j.tvjl.2017.12.026</a>             | Dog-only    | Diffuse degenerative hepatic disease detection                                                                                                                  | Ultrasound images (liver)                                                               | Classification / diagnostic prediction | Deep learning-based approaches       | Histopathology (post-mortem liver histology); neoplastic cases excluded from                                    | Animal/cases: 48 analyzed;                                                                | Internal image-level split: 70% train, 15% validation, 15% test;                     | No                  | AUC                                                                                   | No        | No                                                                                                                            | No                                                                                    | No                                                                                                                            | No               | Image                  |                           |
| Yoon et al., 2018         | 2018 | <a href="https://doi.org/10.1016/j.tvjl.2018.05.009">https://doi.org/10.1016/j.tvjl.2018.05.009</a>             | Dog-only    | Detection of five thoracic radiographic abnormalities (cardiomegaly; abnormal lung pattern; pleural effusion; diaphragmatic elevation; vertebral osteophytosis) | Imaging – thoracic radiography (computed thoracic radiographs)                          | Classification / diagnostic prediction | Hybrid DL/ML approaches              | Three veterinary radiologists independently labeled findings using                                              | Animal/cases: 281 dogs;                                                                   | Split: 60% training / 40% testing for each task; no cross-validation                 | No                  | Accuracy (test set: BOF 79.4-96.9%; CNN 90.8-98.8%)                                   | NR        | NR                                                                                                                            | NR                                                                                    | No                                                                                                                            | No               | Image                  |                           |
| Kim et al., 2019          | 2019 | <a href="https://doi.org/10.1038/s41598-019-50437-0">https://doi.org/10.1038/s41598-019-50437-0</a>             | Dog-only    | Ulcerative keratitis severity classification (normal vs superficial vs deep corneal ulcer)                                                                      | Photos / camera images (corneal photographs)                                            | Classification / diagnostic prediction | Deep learning-based approaches       | Veterinary ophthalmologist: diagnostic evaluation/labeling of corneal                                           | Animal/cases: 281 dogs;                                                                   | Split: 86 image training set / 34 image validation set; data augmentation            | No                  | Accuracy                                                                              | NR        | NR                                                                                                                            | NR                                                                                    | No                                                                                                                            | Yes              | Image                  |                           |
| Spiteri et al., 2019      | 2019 | <a href="https://doi.org/10.1111/ivms.15621">https://doi.org/10.1111/ivms.15621</a>                             | Dog-only    | Chiari-like malformation-associated pain vs control; symptomatic syringomyelia vs control (in Cavalieri)                                                        | Imaging – MRI (T2-weighted midsagittal head/cranial cervical DICOM images)              | Classification / diagnostic prediction | Machine learning-based approaches    | Clinically defined phenotype groups using clinical signs/behavior plus MRI criteria                             | Animal/cases: 32 dogs;                                                                    | CV/resampling: 5-fold cross-validation                                               | No                  | AUC (0.78 for CM-P biomarkers; 0.82 for SM-5 biomarkers)                              | NR        | NR                                                                                                                            | NR                                                                                    | No                                                                                                                            | No               | Animal/patient/case    |                           |
| Yoon et al., 2019         | 2019 | <a href="https://doi.org/10.4142/et.2019.20.e44">https://doi.org/10.4142/et.2019.20.e44</a>                     | Dog-and-cat | Radiographic lung pattern classification (normal; alveolar; bronchial; unstructured interstitial)                                                               | Imaging – thoracic radiography (ROI-based texture analysis)                             | Classification / diagnostic prediction | Machine learning-based approaches    | Consensus classification by three veterinary radiologists; ROI selected by                                      | Animal/cases: 117 animals;                                                                | Split: 70% training / 30% testing; no cross-validation                               | No                  | Accuracy (91.9% testing dataset)                                                      | No        | No                                                                                                                            | No                                                                                    | Yes                                                                                                                           | No               | ROI/path               |                           |
| Boisady et al., 2020      | 2020 | <a href="https://doi.org/10.1111/rvu.12912">https://doi.org/10.1111/rvu.12912</a>                               | Dog-and-cat | Automated screening for primary thoracic radiographic lesions in dogs and cats                                                                                  | Imaging – radiography (thoracic radiographs; DICOM)                                     | Classification / diagnostic prediction | Deep learning-based approaches       | Board-certified veterinary radiologist reports; labels extracted with custom NLP                                | Animal/cases: 6,584 patients;                                                             | Split: patient-level 90% training / 10% validation;                                  | No                  | Overall error rate (0.7% for CNN on 120 radiographs)                                  | NR        | NR                                                                                                                            | NR                                                                                    | No                                                                                                                            | No               | Image                  |                           |
| Burrali et al., 2020      | 2020 | <a href="https://doi.org/10.3390/ani10091687">https://doi.org/10.3390/ani10091687</a>                           | Dog-only    | Prediction of benign vs malignant canine mammary tumors from epidemiological/clinical variables                                                                 | Tabular – epidemiological and clinical variables (age; breed; spayed status)            | Classification / diagnostic prediction | Machine learning-based approaches    | Histopathological diagnosis of mammary neoplasm                                                                 | Animal/cases: NR dogs;                                                                    | Split: 70% training / 30% testing; no cross-validation                               | No                  | Accuracy (GLM 0.63; GBM 0.62)                                                         | No        | Yes                                                                                                                           | <a href="https://doi.org/10.3390/ani10091687">https://doi.org/10.3390/ani10091687</a> | Yes                                                                                                                           | Yes              | Tumor/case             |                           |
| Burti et al., 2020        | 2020 | <a href="https://doi.org/10.1016/j.tvjl.2020.10.0505">https://doi.org/10.1016/j.tvjl.2020.10.0505</a>           | Dog-only    | Cardiomegaly detection on thoracic radiographs                                                                                                                  | Imaging – radiography (right lateral thoracic radiographs)                              | Classification / diagnostic prediction | Deep learning-based approaches       | Breed-specific VHS classification on radiographs; joints assessed by two                                        | Animal/cases: NR;                                                                         | Internal validation by 200 bootstrap resampling;                                     | No                  | AUC                                                                                   | No        | No                                                                                                                            | No                                                                                    | No                                                                                                                            | No               | Image                  |                           |
| Kumar et al., 2020        | 2020 | <a href="https://doi.org/10.1016/j.ins.2019.08.072">https://doi.org/10.1016/j.ins.2019.08.072</a>               | Dog-only    | Binary classification of canine mammary tumors (benign vs malignant) with human breast cancer                                                                   | Histopathology (H&E-stained microscopic images)                                         | Classification / diagnostic prediction | Hybrid DL/ML approaches              | Histopathologic diagnosis by experienced veterinary pathologists (Goldschmidt et al.)                           | Animal/cases: 44 canine;                                                                  | Split: patient-level 70% training / 30% test; CV/resampling: 5-fold cross-validation | No                  | Accuracy (92.75% for canine CMT1s; 100% magnification; 97.5% for human breast cancer) | NR        | NR                                                                                                                            | NR                                                                                    | No                                                                                                                            | No               | Image                  |                           |
| Li et al., 2020           | 2020 | <a href="https://doi.org/10.1111/rvu.12901">https://doi.org/10.1111/rvu.12901</a>                               | Dog-only    | Left atrial enlargement detection on thoracic radiographs                                                                                                       | Imaging – radiography (right lateral thoracic radiographs)                              | Classification / diagnostic prediction | Deep learning-based approaches       | Echocardiographic left atrial enlargement status from formal echocardiography                                   | Animal/cases: 792 dogs;                                                                   | Chronological split: first 711 images (90%) development;                             | No                  | Accuracy (82.71%)                                                                     | No        | No                                                                                                                            | No                                                                                    | No                                                                                                                            | No               | Image                  |                           |
| Nagamori et al., 2020     | 2020 | <a href="https://doi.org/10.1186/s13071-020-04215-x">https://doi.org/10.1186/s13071-020-04215-x</a>             | Dog-and-cat | Intestinal parasite egg detection/identification on fecal flotation slides                                                                                      | Microscopy – scanned fecal flotation slide images                                       | Mixed-output tasks                     | Deep learning-based approaches       | Microscopic examination by experienced diagnostic parasitologists on the same                                   | Animal/cases: 120 animals;                                                                | Independent evaluation of a re-training system on 100 pre-training images            | Yes                 | Pearson correlation coefficient with                                                  | No        | No                                                                                                                            | No                                                                                    | No                                                                                                                            | No               | Sample                 |                           |
| Reagan et al., 2020       | 2020 | <a href="https://doi.org/10.1016/j.domaniens.2019.10.0596">https://doi.org/10.1016/j.domaniens.2019.10.0596</a> | Dog-only    | Hyperadrenocorticism screening/diagnosis                                                                                                                        | Structured laboratory data (CBC and serum chemistry)                                    | Classification / diagnostic prediction | Machine learning-based approaches    | ACTH stimulation test; cases defined by post-ACTH cortisol <2 µg/dL, controls by >2 µg/dL                       | Animal/cases: 1041 dogs (133 positive);                                                   | Random 80%/20% train/test split; Bayesian optimization                               | No                  | AUC                                                                                   | No        | No                                                                                                                            | No                                                                                    | No                                                                                                                            | No               | Animal/patient/case    |                           |
| Schofield et al., 2020    | 2020 | <a href="https://doi.org/10.1111/ivms.15851">https://doi.org/10.1111/ivms.15851</a>                             | Dog-only    | Cushing's syndrome diagnosis at first suspicion in primary care practice                                                                                        | Tabular (primary-care EHM Demographics, clinical signs, routine clinicopathologic data) | Classification / diagnostic prediction | Machine learning-based approaches    | First veterinarian-recorded diagnosis of Cushing's syndrome with LDDST or ACTH                                  | Animal/cases: 593 dogs;                                                                   | Internal validation by 200 bootstrap resampling;                                     | No                  | AUROC (0.78)                                                                          | Yes       | Yes                                                                                                                           | Yes                                                                                   | Yes                                                                                                                           | Yes              | Animal/patient/case    |                           |
| Banzato et al., 2021a     | 2021 | <a href="https://doi.org/10.1038/s41598-021-73136-1">https://doi.org/10.1038/s41598-021-73136-1</a>             | Cat-only    | Automatic detection of thoracic radiographic findings in cats                                                                                                   | Imaging – radiography (X-ray)                                                           | Classification / diagnostic prediction | Deep learning-based approaches       | Consensus interpretation by two experienced veterinary radiologists;                                            | Animal/cases: NR;                                                                         | Split: 8:1 train/validation/test;                                                    | No                  | AUC                                                                                   | No        | Data available from corresponding author on reasonable request                                                                | NR                                                                                    | NR                                                                                                                            | Yes              | Yes                    | Image                     |
| Banzato et al., 2021b     | 2021 | <a href="https://doi.org/10.1038/s41598-021-83515-3">https://doi.org/10.1038/s41598-021-83515-3</a>             | Dog-only    | Thoracic radiographic finding classification (multi-label; 9 findings)                                                                                          | Imaging – thoracic radiography (latero-lateral radiographs)                             | Classification / diagnostic prediction | Deep learning-based approaches       | Consensus labels assigned by three experienced veterinary radiologists                                          | Animal/cases: NR;                                                                         | Data set 1: train/validation/test split 8:1:1;                                       | No                  | AUC (per finding: ResNet-50 >0.8 for most included findings)                          | No        | Yes                                                                                                                           | No                                                                                    | No                                                                                                                            | Yes              | No                     | Image                     |
| Baydan et al., 2021       | 2021 | <a href="https://doi.org/10.33988/auvfd.772685">https://doi.org/10.33988/auvfd.772685</a>                       | Dog-and-cat | Tibial fracture detection and fracture localization                                                                                                             | Radiography (whole/partial body X-ray images)                                           | Detection / localisation               | Deep learning-based approaches       | Veterinarian-annotated fracture/no-fracture tibial labels and fracture location                                 | Animal/cases: NR;                                                                         | Multiple train/test splits across experiments; no cross-validation                   | No                  | F1 score (84.5%; proposed two-stage S1 framework)                                     | No        | No                                                                                                                            | No                                                                                    | No                                                                                                                            | No               | Image                  |                           |
| Caputa et al., 2021       | 2021 | <a href="https://doi.org/10.3390/app11167181">https://doi.org/10.3390/app11167181</a>                           | Dog-only    | Round-cell neoplastic cell detection in canine skin cytology (lymphoma, histiocytoma, mastocytoma)                                                              | Cytology microscopy / smear images (skin cytology)                                      | Mixed-output tasks                     | Deep learning-based approaches       | Vet doctor manual annotation of tumor cells in cytology images                                                  | Sample/record: 12/29;                                                                     | Split: 70/20/10 train/validation/test                                                | No                  | mAP (0.7416)                                                                          | Yes       | <a href="https://git.pligrid.pl/projects/CYFR-ONE?report=dataset">https://git.pligrid.pl/projects/CYFR-ONE?report=dataset</a> | Yes                                                                                   | <a href="https://git.pligrid.pl/projects/CYFR-ONE?report=dataset">https://git.pligrid.pl/projects/CYFR-ONE?report=dataset</a> | No               | NR                     | ROI/reson/object          |
| Cheng et al., 2021        | 2021 | <a href="https://doi.org/10.1093/bib/bbaa252">https://doi.org/10.1093/bib/bbaa252</a>                           | Dog-only    | Canine hemangiosarcoma vs nonmalignant splenic hematoma                                                                                                         | Transcriptomics (RNA-seq from tissue)                                                   | Classification / diagnostic prediction | Machine learning-based approaches    | Histopathology (hemangiosarcoma vs splenic hematoma)                                                            | Animal/cases: 74 dogs;                                                                    | Training on 14 inflammatory hemangiosarcoma + 10                                     | No                  | AUC (1.00; EXT, 10-fold CV on all samples)                                            | Yes       | No                                                                                                                            | No                                                                                    | No                                                                                                                            | Yes              | No                     | Sample                    |
| Larios et al., 2021       | 2021 | <a href="https://doi.org/10.1002/jbio.202100141">https://doi.org/10.1002/jbio.202100141</a>                     | Dog-only    | Canine visceral leishmaniasis diagnosis vs noninfected and Trypanosoma evansi infected                                                                          | FTIR spectroscopy of blood serum                                                        | Classification / diagnostic prediction | Machine learning-based approaches    | ELISA and immunochromatographic assay for L. infantum; PCR and DNA sequencing                                   | Animal/cases: 48 dogs;                                                                    | CV/resampling: LOOCV; no train/test split                                            | No                  | Accuracy (0.8542; 3 class classification)                                             | No        | NR                                                                                                                            | NR                                                                                    | Yes                                                                                                                           | NR               | Animal/patient/case    |                           |
| Nagamori et al., 2021     | 2021 | <a href="https://doi.org/10.1186/s13071-021-04591-y">https://doi.org/10.1186/s13071-021-04591-y</a>             | Dog-and-cat | Intestinal parasite egg/cooyst/cyst detection on fecal flotation slides                                                                                         | Microscopy – scanned fecal flotation slide images                                       | Mixed-output tasks                     | Deep learning-based approaches       | Expert microscopic evaluation by parasitologists/technician on the same                                         | Animal/cases: NR;                                                                         | Independent evaluation of an updated pre-existing system on 100 pre-training images  | Yes                 | Sensitivity_range (75.8-100%)                                                         | No        | No                                                                                                                            | No                                                                                    | No                                                                                                                            | No               | Sample                 |                           |
| Salvi et al., 2021        | 2021 | <a href="https://doi.org/10.3389/fvets.2021.640944">https://doi.org/10.3389/fvets.2021.640944</a>               | Dog-only    | Cutaneous round cell tumor subtype classification; mast cell tumor grading                                                                                      | Histopathology (H&E-stained digital images)                                             | Classification / diagnostic prediction | Deep learning-based approaches       | Pathologist diagnosis supported by immunohistochemistry; Patnik grade for                                       | Animal/cases: 117 RCT cases;                                                              | Random train/test split; RCT classification used 392 train                           | No                  | Image-level accuracy (RCT test) (0.9366)                                              | No        | No                                                                                                                            | No                                                                                    | No                                                                                                                            | No               | Yes                    | Image                     |
| Schofield et al., 2021    | 2021 | <a href="https://doi.org/10.1038/s41598-021-88440-z">https://doi.org/10.1038/s41598-021-88440-z</a>             | Dog-only    | Diagnostic support for Cushing's syndrome at first suspicion in primary care practice                                                                           | Tabular (EPK Demographics, clinical signs, and laboratory data)                         | Classification / diagnostic prediction | Machine learning-based approaches    | Final veterinarian-recorded diagnosis of Cushing's syndrome with LDDST or ACTH                                  | Animal/cases: 539 dogs (177 positive);                                                    | Random 67% training / 33% testing; feature elimination with cross-validation         | No                  | AUROC (test; LASSO) (0.85)                                                            | No        | No                                                                                                                            | No                                                                                    | No                                                                                                                            | Yes              | Yes                    | Animal/patient/case       |
| Yaker et al., 2021        | 2021 | <a href="https://doi.org/10.1111/rvu.13012">https://doi.org/10.1111/rvu.13012</a>                               | Dog-only    | Hepatic mass histologic malignancy prediction                                                                                                                   | CT radiomics (trihaptic abdominal CT; precontrast and delayed postcontrast)             | Classification / diagnostic prediction | Machine learning-based approaches    | Histopathology of the corresponding biopsied liver mass                                                         | Animal/cases: 40 dogs (13 positive);                                                      | Internal validation by 200 bootstrap resampling;                                     | No                  | Accuracy (0.90)                                                                       | No        | No                                                                                                                            | No                                                                                    | No                                                                                                                            | Yes              | No                     | Tumor/case                |
| Shen et al., 2021         | 2021 | <a href="https://doi.org/10.1111/cco.12747">https://doi.org/10.1111/cco.12747</a>                               | Dog-only    | Intraoperative surgical margin assessment of canine soft tissue sarcoma                                                                                         | Spectral-domain optical coherence tomography (OCT)                                      | Classification / diagnostic prediction | Deep learning-based approaches       | Complete surgical margin pathology (tangential sections) with expert-reviewed                                   | Animal/cases: 24 dogs;                                                                    | Split: 80% training / 20% normal images; validation 20                               | No                  | Accuracy (0.97; 1.1% validation; 96% independent test)                                | No        | No                                                                                                                            | No                                                                                    | No                                                                                                                            | Yes              | No                     | ROI/path                  |
| Burti et al., 2022        | 2022 | <a href="https://doi.org/10.3389/fvets.2022.872618">https://doi.org/10.3389/fvets.2022.872618</a>               | Dog-only    | Classification of focal splenic lesion histotype on CT                                                                                                          | Computed tomography (pre-contrast and delayed post-contrast CT)                         | Classification / diagnostic prediction | Machine learning-based approaches    | Cytopathology and/or histopathology                                                                             | Animal/cases: 52 dogs / 52 dogs;                                                          | No independent train/test split reported; recursive partitioning                     | No                  | Balanced accuracy (NH 0.79; OBL 0.79; RCT 0.50; SA 0.89)                              | Yes       | Yes                                                                                                                           | Yes                                                                                   | Yes                                                                                                                           | Yes              | ROI/reson/object       |                           |
| Dumortier et al., 2022    | 2022 | <a href="https://doi.org/10.1038/s41598-022-14993-2">https://doi.org/10.1038/s41598-022-14993-2</a>             | Cat-only    | Detection of pulmonary radiographic abnormalities / radiographic pulmonary patterns                                                                             | Thoracic radiography (lateral thoracic radiographs)                                     | Classification / diagnostic prediction | Deep learning-based approaches       | Medical imaging report (MRI) based annotation / case report label                                               | Animal/cases: 548 cases / 560 cases;                                                      | Split: 455 images for training/validation and 45                                     | No                  | F1 score (85%)                                                                        | No        | Partial test-set material: <a href="https://github.com/latreth/Vet-Data">https://github.com/latreth/Vet-Data</a>              | NR                                                                                    | NR                                                                                                                            | Yes              | No                     | Image                     |
| Engelman et al., 2022     | 2022 | <a href="https://doi.org/10.3389/fvets.2022.912553">https://doi.org/10.3389/fvets.2022.912553</a>               | Dog-only    | Detection of ataxic gait                                                                                                                                        | Wearable IMU (smartphone accelerometer + gyroscope)                                     | Classification / diagnostic prediction | Machine learning-based approaches    | Neurological examination / clinician-assigned healthy vs ataxic status                                          | Animal/cases: 78 dogs (55 ataxic);                                                        | Window size benchmarking with 80/20 train test split;                                | No                  | Accuracy (95.77%)                                                                     | No        | No                                                                                                                            | No                                                                                    | No                                                                                                                            | Yes              | Exam/recording/time    |                           |
| Ferreira et al., 2022     | 2022 | <a href="https://doi.org/10.3390/s220991318">https://doi.org/10.3390/s220991318</a>                             | Dog-only    | Canine visceral leishmaniasis diagnosis from physical examination findings                                                                                      | Tabular – physical examination / clinical features                                      | Classification / diagnostic prediction | Machine learning-based approaches    | ELISA serological test                                                                                          | Animal/cases: 80/20 train/test split; recursive feature elimination with cross-validation | No                                                                                   | Accuracy (0.75)     | No                                                                                    | No        | No                                                                                                                            | No                                                                                    | Yes                                                                                                                           | NR               | Animal/patient/case    |                           |
| Figueirinhas et al., 2022 | 2022 | <a href="https://doi.org/10.3390/ani12141755">https://doi.org/10.3390/ani12141755</a>                           | Dog-only    | Unilateral supporting hindlimb lameness detection                                                                                                               | IMU inertial-sensor roll-angle time series detection                                    | Classification / diagnostic prediction | Neural networks (non-deep / non-CNN) | Clinical classification of dogs as sound vs unilateral hindlimb lame; exact reference                           | Animal/cases: 15 working dogs;                                                            | Development on 12 dogs with verification on 3 additional                             | No                  | Accuracy (85.7%)                                                                      | Yes       | <a href="https://github.com/AgSanches/TF-G-Backend">https://github.com/AgSanches/TF-G-Backend</a>                             | Yes                                                                                   | No                                                                                                                            | No               | Signal/waveform record |                           |
| Hespel et al., 2022       | 2022 | <a href="https://doi.org/10.1111/rvu.13069">https://doi.org/10.1111/rvu.13069</a>                               | Dog-only    | Detection of 15 thoracic radiographic labels                                                                                                                    | X-ray                                                                                   | Classification / diagnostic prediction | Deep learning-based approaches       | Majority of 1 board-certified radiologists (gold standard)                                                      | Animal/cases: 50;                                                                         | Split: train/validation/test                                                         | No                  | Overall error rate (best model) (15.8%)                                               | No        | No                                                                                                                            | No                                                                                    | No                                                                                                                            | NR               | No                     | Animal/patient/case       |
| Hwang et al., 2022        | 2022 | <a href="https://doi.org/10.1007/s13273-022-00249-7">https://doi.org/10.1007/s13273-022-00249-7</a>             | Dog-only    | Bacterial dermatitis / fungal infection / hypersensitivity allergic dermatosis classification                                                                   | Skin images (RGB + multispectral)                                                       | Classification / diagnostic prediction | Deep learning-based approaches       | Veterinarian diagnosis / label assignment after clinical examination                                            | Animal/cases: 95 dogs;                                                                    | Split: separate hold-out validation set of original images                           | No                  | Accuracy (0.88; bacterial dermatosis consensus)                                       | Yes       | <a href="https://doi.org/10.17632/5dbb54kw7.1">https://doi.org/10.17632/5dbb54kw7.1</a>                                       | No                                                                                    | No                                                                                                                            | No               | No                     | Image                     |
| Jeong et al., 2022        | 2022 | <a href="https://doi.org/10.1038/s41598-022-18822-4">https://doi.org/10.1038/s41598-022-18822-4</a>             | Dog-only    | Canine cardiomegaly detection                                                                                                                                   | X-ray                                                                                   | Classification / diagnostic prediction | Deep learning-based approaches       | Manual masks; echocardiography labels                                                                           | Animal/cases: 1200;                                                                       | CV/resampling: 10-fold inner                                                         | No                  | AUROC (0.83)                                                                          | No        | Yes                                                                                                                           | <a href="https://github.com/jeongjin/a/HVI">https://github.com/jeongjin/a/HVI</a>     | Yes                                                                                                                           | No               | Image                  |                           |



|                             |      |                                                                                                                     |          |                                                                                                     |                                                                                     |                                        |                                   |                                                                                         |                               |                                                                                   |    |                                                                 |     |                                                                                                                                                         |                                                                             |     |                     |                     |
|-----------------------------|------|---------------------------------------------------------------------------------------------------------------------|----------|-----------------------------------------------------------------------------------------------------|-------------------------------------------------------------------------------------|----------------------------------------|-----------------------------------|-----------------------------------------------------------------------------------------|-------------------------------|-----------------------------------------------------------------------------------|----|-----------------------------------------------------------------|-----|---------------------------------------------------------------------------------------------------------------------------------------------------------|-----------------------------------------------------------------------------|-----|---------------------|---------------------|
| Flegel et al., 2024         | 2024 | <a href="https://doi.org/10.3389/fvets.2024.1406107">https://doi.org/10.3389/fvets.2024.1406107</a>                 | Dog-only | Structural epilepsy diagnosis / risk of structural epilepsy in seizing dogs                         | Structured clinical history + neurological examination / diagnostic work-up tabular | Classification / diagnostic prediction | Machine learning-based approaches | Final clinical diagnosis of structural epilepsy after diagnostic work-up                | Animals/cases: 328 dogs (279) | CV/resampling: 10-fold cross-validation                                           | No | Accuracy (0.969)                                                | No  | No                                                                                                                                                      | No                                                                          | Yes | No                  | Animal/patient/case |
| Flory et al., 2024          | 2024 | <a href="https://doi.org/10.2460/javma.23.1.0.0564">https://doi.org/10.2460/javma.23.1.0.0564</a>                   | Dog-only | Multi-cancer screening / early cancer detection                                                     | Liquid biopsy / plasma cfDNA quantification + reflex NGS                            | Classification / diagnostic prediction | Machine learning-based approaches | Cancer diagnosis from histopathology/cytology where available                           | Animals/cases: 1,947 dogs     | Split: 60/40 random training/testing split;                                       | No | Sensitivity at specificity (71.3% at 98.7% specificity)         | No  | No                                                                                                                                                      | No                                                                          | No  | Yes                 | Animal/patient/case |
| Huang et al., 2024          | 2024 | <a href="https://doi.org/10.1038/s41598-024-57749-5">https://doi.org/10.1038/s41598-024-57749-5</a>                 | Dog-only | Intervertebral disc herniation (IVDH) lesion detection/localization                                 | MRI (T2-weighted sagittal spinal MRI)                                               | Detection / localisation               | Deep learning-based approaches    | Veterinary radiologist annotation of spine region and IVDH lesions on MRI               | Animals/cases: 213 dogs       | Automatic random train/validation/test split by dog; CV/resampling: No            | No | AP (0.7532)                                                     | No  | NR                                                                                                                                                      | No                                                                          | No  | No                  | ROI/lesion/object   |
| Il et al., 2024             | 2024 | <a href="https://doi.org/10.1292/jvms.23-0299">https://doi.org/10.1292/jvms.23-0299</a>                             | Cat-only | Intestinal T-cell lymphoma vs chronic enteropathy (with additional secondary models for cell size)  | Histology images (digital slide image crops from duodenal endoscopic biopsy)        | Classification / diagnostic prediction | Hybrid DL/ML approaches           | Histopathologic diagnosis by blinded pathologist with consensus review when applicable  | Animals/cases: 72 cats (35)   | Automatic random train/validation/test split by patient                           | No | AUC (Experiment 1: 0.943)                                       | No  | No                                                                                                                                                      | No                                                                          | No  | No                  | Image               |
| Kim et al., 2024            | 2024 | <a href="https://doi.org/10.3389/fvets.2024.1390296">https://doi.org/10.3389/fvets.2024.1390296</a>                 | Dog-only | Canine cognitive dysfunction syndrome (CCDS) early detection / screening                            | Blood biomarkers (plasma ELISA) + clinical questionnaire score                      | Classification / diagnostic prediction | Machine learning-based approaches | Modified 18-item CCDS score-based grouping (Normal / MCI / SCI / CCDS)                  | Animals/cases: 85 dogs        | Split: 70/30 train/test; 10 random repeated experiments                           | No | AUC (0.84; normal vs MCI, RBP4 + NOX4 SVM)                      | Yes | <a href="https://www.frontiersin.org/articles/10.3389/fvets.2024.1390296/full">https://www.frontiersin.org/articles/10.3389/fvets.2024.1390296/full</a> | No                                                                          | No  | Yes                 | Animal/patient/case |
| Kuo et al., 2024            | 2024 | <a href="https://doi.org/10.1016/j.complbiolhem.2024.108227">https://doi.org/10.1016/j.complbiolhem.2024.108227</a> | Cat-only | FIP diagnosis                                                                                       | Tabular + molecular (qPCR, S gene mutations, clinical)                              | Classification / diagnostic prediction | Machine learning-based approaches | Autopsy + IHC confirmed FIP                                                             | Animals/cases: 127            | Split: bootstrap, k-fold, LOOCV; CV/resampling: Yes                               | No | Accuracy (0.9541)                                               | No  | NR                                                                                                                                                      | No                                                                          | No  | No                  | Sample              |
| Li et al., 2024             | 2024 | <a href="https://doi.org/10.1038/s41598-023-50063-x">https://doi.org/10.1038/s41598-023-50063-x</a>                 | Dog-only | Cardiomegaly assessment on thoracic radiographs via VHS-linked prediction                           | Imaging – thoracic radiography (X-ray images)                                       | Mixed-output tasks                     | Deep learning-based approaches    | Expert-labeled VHS key points and derived VHS-based class labels (small, medium, large) | Animals/cases: 2,000 dogs     | Split: training 1400 (70%), validation 200 (10%), test 400 (20%)                  | No | Test accuracy (87.3%; RVT with proposed loss)                   | No  | No                                                                                                                                                      | No                                                                          | Yes | No                  | Image               |
| Loureiro et al., 2024       | 2024 | <a href="https://doi.org/10.1007/s11042-024-20072-7">https://doi.org/10.1007/s11042-024-20072-7</a>                 | Dog-only | Canine hip dysplasia (CHD) assessment                                                               | X-ray                                                                               | Classification / diagnostic prediction | Deep learning-based approaches    | Specialist manual measurements                                                          | Animals/cases: 52             | Split: train 70 / val 15 / test 15; CV/resampling: No                             | No | FNT index ICC vs expert (0.883)                                 | No  | No                                                                                                                                                      | Yes                                                                         | Yes | Image               |                     |
| McDonald et al., 2024a      | 2024 | <a href="https://doi.org/10.1111/jvim.17224">https://doi.org/10.1111/jvim.17224</a>                                 | Dog-only | Heart murmur detection/grading; preclinical MMVD stage B1 vs B2 support                             | Heart sound audio (electronic stethoscope recordings)                               | Classification / diagnostic prediction | Deep learning-based approaches    | Cardiologist murmur grading (reduced Levine scale) and echocardiographic                | Animals/cases: 756 dogs       | Split: repeated stratified 50/50 train/test over 50 runs                          | No | AUC (0.861; differentiation of preclinical MMVD stage B1 vs B2) | No  | No                                                                                                                                                      | No                                                                          | Yes | Exam/recording/time |                     |
| McDonald et al., 2024b      | 2024 | <a href="https://doi.org/10.1371/journal.pone.0305633">https://doi.org/10.1371/journal.pone.0305633</a>             | Dog-only | BOAS screening and grading                                                                          | Audio (electronic stethoscope)                                                      | Classification / diagnostic prediction | Deep learning-based approaches    | Veterinarian assigned BOAS functional grading (RFG scheme) from pre- and post-          | Animals/cases: 341 dogs (374) | Nested cross-validation: 5-fold outer / 4-fold inner with                         | No | AUROC (0.85)                                                    | No  | Yes                                                                                                                                                     | <a href="https://github.com/am2234/boas">https://github.com/am2234/boas</a> | Yes | Yes                 | Exam/recording/time |
| Nery et al., 2024           | 2024 | <a href="https://doi.org/10.5380/avs.v29i3.95142">https://doi.org/10.5380/avs.v29i3.95142</a>                       | Dog-only | Left atrial enlargement detection / MMVD radiographic screening                                     | X-ray                                                                               | Classification / diagnostic prediction | Deep learning-based approaches    | Radiologist review with echocardiographic confirmation of atrial enlargement            | Animals/cases: 451 adult      | CV/resampling: 5-fold cross-validation; training repeated                         | No | AUC (0.8942 mean best model; 0.9535 best fold)                  | No  | No                                                                                                                                                      | No                                                                          | Yes | Image               |                     |
| Park et al., 2024           | 2024 | <a href="https://doi.org/10.3389/fvets.2024.1453765">https://doi.org/10.3389/fvets.2024.1453765</a>                 | Dog-only | Automatic detection of narrowed intervertebral disc spaces as a screening/localization aid for IVDH | Lateral caudal thoracic and lumbar radiographs                                      | Detection / localisation               | Deep learning-based approaches    | Three veterinary clinicians' labels of narrowed IVD sites on radiographs; MRI           | Animals/cases: 142 dogs       | Approximate 80/20 train/validation split (85/21)                                  | No | Kappa vs veterinary clinicians in the validation                | No  | No                                                                                                                                                      | No                                                                          | No  | No                  | ROI/lesion/object   |
| Rajan et al., 2024          | 2024 | <a href="https://doi.org/10.1186/s12917-024-04242-1">https://doi.org/10.1186/s12917-024-04242-1</a>                 | Dog-only | Estrous cycle stage classification / optimal mating period assessment                               | Vaginoscopic images of the anterior vagina                                          | Classification / diagnostic prediction | Hybrid DL/ML approaches           | Vaginoscopic stage labels confirmed by same-day serum progesterone levels               | Animals/cases: 81             | Split: none reported; CV/resampling: none reported                                | No | Average accuracy (best model: 0.9037)                           | No  | No                                                                                                                                                      | No                                                                          | Yes | No                  | Image               |
| Santos et al., 2024         | 2024 | <a href="https://doi.org/10.3389/fvets.2024.1523170">https://doi.org/10.3389/fvets.2024.1523170</a>                 | Dog-only | Hypoadrenocorticism screening/diagnosis in dogs with resting hyponatremia                           | Clinical signs + haematology / biochemistry / electrolytes                          | Classification / diagnostic prediction | Machine learning-based approaches | ACTH stimulation test (post-ACTH cortisol <2.0 µg/dL = IAH; otherwise not IAH)          | Animals/cases: 30 analyzed    | Split: none reported; CV/resampling: none reported                                | No | AUC (0.92)                                                      | No  | No                                                                                                                                                      | No                                                                          | Yes | Animal/patient/case |                     |
| Smith et al., 2024          | 2024 | <a href="https://doi.org/10.1111/vde.13221">https://doi.org/10.1111/vde.13221</a>                                   | Dog-only | Paw lesion detection; pododermatitis vs neoplasia vs healthy paw                                    | Still and video paw images / clinical photographs                                   | Detection / localisation               | Deep learning-based approaches    | Clinical class labels with manual bounding box annotations; neoplasia cases             | Animals/cases: NR             | Random 90/20 train/validation split without data leakage                          | No | mAP (Dataset A, Timy YOLOv4: 0.95)                              | No  | No                                                                                                                                                      | No                                                                          | No  | No                  | ROI/lesion/object   |
| Suksangvorwong et al., 2024 | 2024 | <a href="https://doi.org/10.1111/rvs.13413">https://doi.org/10.1111/rvs.13413</a>                                   | Dog-only | Tracheal collapse screening and severity grading                                                    | X-ray                                                                               | Classification / diagnostic prediction | Deep learning-based approaches    | Radiographic tracheal height/thoracic inlet (TH/TI) ratio-based grading on              | Animals/cases: 600 dogs       | Split: 540 training/integrated validation + 60 test (90/10)                       | No | Accuracy (0.989)                                                | No  | No                                                                                                                                                      | No                                                                          | No  | No                  | Image               |
| Valente et al., 2024        | 2024 | <a href="https://doi.org/10.1016/j.rvsc.2024.105377">https://doi.org/10.1016/j.rvsc.2024.105377</a>                 | Dog-only | MMVD severity staging (ACVIM and MINE)                                                              | X-ray                                                                               | Classification / diagnostic prediction | Deep learning-based approaches    | ACVIM stage assigned from concomitant echocardiography plus                             | Animals/cases: 556 dogs       | Split: None fixed hold-out split reported; CV/resampling: 5-fold cross-validation | No | AUC (ACVIM classes: 0.79–0.89; MINE classes: 0.7–0.8)           | No  | No                                                                                                                                                      | Yes                                                                         | Yes | Image               |                     |
| Yu et al., 2024             | 2024 | <a href="https://doi.org/10.3389/fvets.2024.1443234">https://doi.org/10.3389/fvets.2024.1443234</a>                 | Dog-only | Chronic kidney disease IRIS staging                                                                 | US                                                                                  | Classification / diagnostic prediction | Deep learning-based approaches    | CKD IRIS stage assigned from clinical records using blood tests and ultrasound          | Animals/cases: 198 dogs       | Split: 7:1:1 train/validation/test per                                            | No | Accuracy (binary IRIS 0–2 vs 3–4) (0.85)                        | No  | No                                                                                                                                                      | No                                                                          | No  | No                  | Image               |

Note: Concise study citation and DOI/URL are retained for traceability. Primary AI task and AI methodological family are presented in grouped form for consistency with the descriptive synthesis reported in the manuscript.
